# Supplementary material
Source: PubMed Central journal article supplement (PMC5548393)
Supplement: NIHMS888039-supplement-Supplement_2.pdf [file NIHMS888039-supplement-Supplement_2.pdf]

## Supplementary Online Content

Kannankeril PJ, Moore JP, Cerrone M, et al. Efficacy of flecainide in the treatment of catecholaminergic polymorphic ventricular tachycardia: a randomized clinical trial. *JAMA Cardiol*. Published online May 10, 2017. doi:10.1001/jamacardio.2017.1320

**eTable 1.** Results of Exercise Tests

**eTable 2.** Adverse Events

This supplementary material has been provided by the authors to give readers additional information about their work.

eTable 1. Results of Exercise Tests

|                                                            | Baseline<br>(n=13) | <i>P</i> Value<br>(Baseline<br>vs<br>Placebo) | Placebo<br>(n=12) | <i>P</i> Value<br>(Placebo<br>vs<br>Flecainide) | Flecainide<br>(n=13) | <i>P</i> Value<br>(Flecainide<br>vs Baseline) |
|------------------------------------------------------------|--------------------|-----------------------------------------------|-------------------|-------------------------------------------------|----------------------|-----------------------------------------------|
| Resting<br>HR (bpm)                                        | 56 (42-<br>69)     | .06                                           | 62 (50-<br>69)    | .24                                             | 54 (47-79)           | .75                                           |
| Peak HR<br>(bpm)                                           | 154 (103-<br>196)  | .99                                           | 150 (107-<br>203) | .02                                             | 132 (108-<br>196)    | .01                                           |
| Exercise<br>time<br>(seconds)                              | 651 (419-<br>782)  | .84                                           | 612 (262-<br>786) | >.991                                           | 642 (407-<br>765)    | .38                                           |
| Maximum<br>workload<br>(calculated<br>VO <sub>2</sub> max) | 36 (23-<br>47)     | .96                                           | 33 (16-<br>47)    | .93                                             | 38.5 (22-<br>46)     | .61                                           |

Data are presented as median and range. VO<sub>2</sub> calculated from exercise time on Bruce protocol (n=12 baseline, n=11 placebo, n=12 flecainide) using VO<sub>2</sub>max (ml/kg/min) = 14.76 - (1.379 × T) + (0.451 × T<sup>2</sup>) - (0.012 × T<sup>3</sup>).

eTable 2. Adverse Events

| <b>Serious Adverse Event</b>                          | <b>Study Drug</b> | <b>Relation to Study Drug</b> | <b>Outcome/Comments</b>                                                                |
|-------------------------------------------------------|-------------------|-------------------------------|----------------------------------------------------------------------------------------|
| Suicidal ideation requiring hospitalization*          | Placebo           | Unlikely                      | Resolved in 2 days.                                                                    |
| ICD infection requiring removal and replacement       | Placebo           | Unlikely                      |                                                                                        |
| Back pain after previous spinal surgery*              | Placebo           | Unlikely                      | Resolved after second spinal surgery                                                   |
| Allergic reaction to topical antibiotic used for acne | Flecainide        | Unlikely                      | Resolved after discontinuation of topical antibiotic                                   |
| Supraventricular tachycardia                          | Placebo           | Unlikely                      | Episode of atrial tachycardia on ICD prompted electrophysiology study without ablation |
| Vasovagal Syncope without arrhythmias on ICD          | Flecainide        | Unlikely                      | Brief loss of consciousness after shower                                               |

\* The subjects reporting these events during the trial had a history of these symptoms predating study participation.
